# Supplementary material for: Colorimetric Detection of Chromium(VI) Ions in Water Using Unfolded-Fullerene Carbon Nanoparticles
Source: MDPI journal article supplement (doi:10.3390/s21196353), 2021-09-23
Supplement: s1 [file s1]

# Colorimetric Detection of Chromium(VI) Ions in Water Using Unfolded-Fullerene Carbon Nanoparticles

Saeedeh Babazadeh <sup>1,2</sup>, Ramanand Bisauriya <sup>1</sup>, Marilena Carbone <sup>3,\*</sup>, Ludovica Roselli <sup>3</sup>, Daniele Cecchetti <sup>3</sup>, Elvira Maria Bauer <sup>4</sup>, Simona Sennato <sup>5</sup>, Paolo Proposito <sup>1</sup> and Roberto Pizzoferrato <sup>1,\*</sup>

<sup>1</sup> Department of Industrial Engineering, University of Rome Tor Vergata, 00133 Rome, Italy; s.babazadeh1990@gmail.com (S.B.); r.bisauriya@gmail.com (R.B.); paolo.proposito@uniroma2.it (P.P.)

<sup>2</sup> Department of Mechanical Engineering of Biosystems, Agriculture Faculty, Urmia University, 5756151818 Urmia, Iran

<sup>3</sup> Department of Chemical Science and Technologies, University of Rome Tor Vergata, 00133 Rome, Italy; ludovica.roselli@alumni.uniroma2.eu (L.R.); daniele.cecchetti@uniroma2.it (D.C.)

<sup>4</sup> Institute of Structure of Matter (ISM), Italian National Research Council (CNR), 00015 Rome, Italy; elvira.bauer@ism.cnr.it

<sup>5</sup> Institute for Complex Systems (ISC), Italian National Research Council (CNR) and Physics Department, Sapienza University of Rome, 00185 Rome, Italy; simona.sennato@roma1.infn.it

\* Correspondence: carbone@uniroma2.it (M.C.); pizzoferrato@uniroma2.it (R.P.)

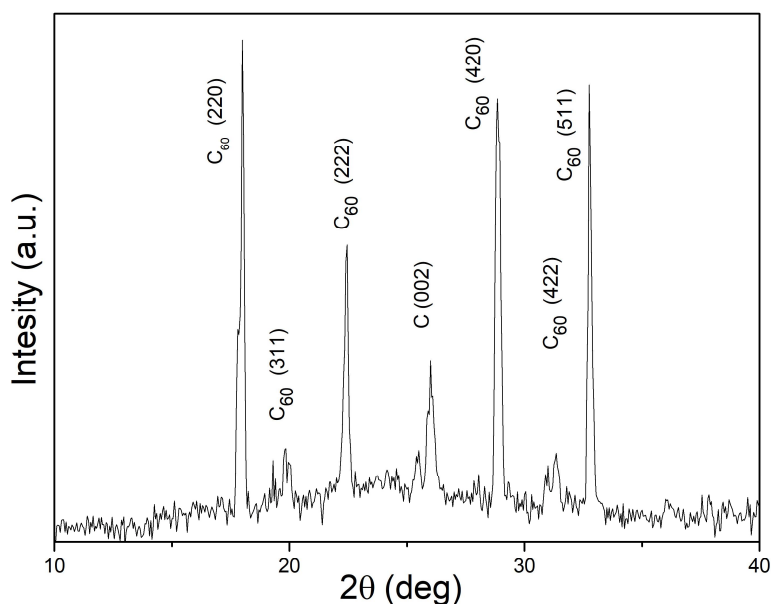

**Figure S1.** X-ray powder diffraction pattern of synthesized N-CDs.

**Table S1.** Main IR peaks of the pristine fullerene-C<sub>60</sub>, mixture water-THF (W-THF) N-CDs-W, N-CDs-W-THF and corresponding assignments; s=strong, m=medium, w=weak, br=broad, sp=sharp, sh=shoulder.

| Fullerene | W-THF   | N-CDs-W    | N-CDs-W-THF | Assignments                                         |
|-----------|---------|------------|-------------|-----------------------------------------------------|
|           |         | 3430 m br  | 3390 m br   | -O-H stretching                                     |
|           |         | 3240 m br  | 3205m br    | -N-H asymmetric stretching                          |
|           | 3360 br |            |             | -O-H stretching                                     |
|           |         | 3192 m sh  |             | -N-H symmetric stretching                           |
|           |         | 3047 m br  | 3053 m br   | -CH aromatic stretching                             |
|           |         |            | 2953 m br   | -CH <sub>x</sub> stretching                         |
|           | 2974 w  |            |             | -CH <sub>2</sub> asymmetric stretching              |
|           | 2877 w  |            |             | -CH <sub>2</sub> symmetric stretching               |
|           |         | 2866 sh    | 2882 w br   | -CH <sub>x</sub> stretching                         |
|           |         | 1753 vw    |             | -C=O carboxylic stretching                          |
|           |         |            | 1707 s sp   | -C=O carboxylic stretching                          |
|           |         | 1672 vw br |             | -C=O primary amide stretching                       |
|           | 1635m   |            |             | -O-H bending                                        |
|           |         | 1630 m sp  |             | -C=C, -C=O stretching, -NH <sub>2</sub> scissoring  |
|           |         | 1593 vw br |             | -C=C, -C=O stretching, -NH <sub>2</sub> scissoring  |
|           |         |            | 1548w br    | -C=C, -C=O stretching, -NH <sub>2</sub> scissoring  |
|           | 1465 w  |            |             | -CH <sub>2</sub> deformation bending                |
| 1427 m sp |         |            |             | -C=C- tangential displacement                       |
|           |         | 1409 s br  | 1406 s br   | -C-N amide III stretching, -C-O hydroxyl stretching |
|           |         |            | 1329 s br   | -C-OH carboxylic acid stretching                    |
|           | 1367 w  |            |             | -CH <sub>2</sub> deformation bending                |
|           |         | 1307 s br  |             | -C-OH carboxylic acid stretching                    |
|           |         |            | 1245 m br   | -CH <sub>x</sub> wagging                            |
|           |         |            | 1209 m sh   | -CH <sub>x</sub> wagging                            |
|           |         |            | 1178 m sh   | -C-OH carboxyl stretching                           |
|           | 1190 w  |            |             | O-H...O-C stretching                                |
| 1180 m sp |         |            |             | -C=C- tangential displacement                       |
|           |         | 1094 w sh  |             | -C-O-C asymmetric ether stretching                  |
|           | 1055 br |            | 1055 s br   | -C-O-C- asymmetric stretching                       |
|           |         | 1042 m sp  | 1032 m sh   | -C-O-C asymmetric ether stretching                  |
|           |         |            | 1022 m sh   | -C-O-C asymmetric ether stretching                  |
|           | 914 w   |            |             | -CH <sub>2</sub> -CH <sub>2</sub> - stretching      |
|           |         |            | 935 w sp    | -NH wagging, -C-O-C symmetric ether stretching      |
|           |         |            | 905 w sp    | -C-O-C symmetric ether stretching,                  |
|           |         |            | 874 vw br   | -NH wagging, -C-O-C symmetric ether stretching      |
|           |         | 827 m sp   | 826 s sp    | -C-O-C epoxy bending                                |
|           | 807 w   |            |             |                                                     |
|           |         | 714 m sp   |             | -NH <sub>2</sub> wagging                            |
| 572 s sp  |         |            |             | -C-H radial displacement                            |
| 522 s sp  |         |            |             | -C-H radial displacement                            |

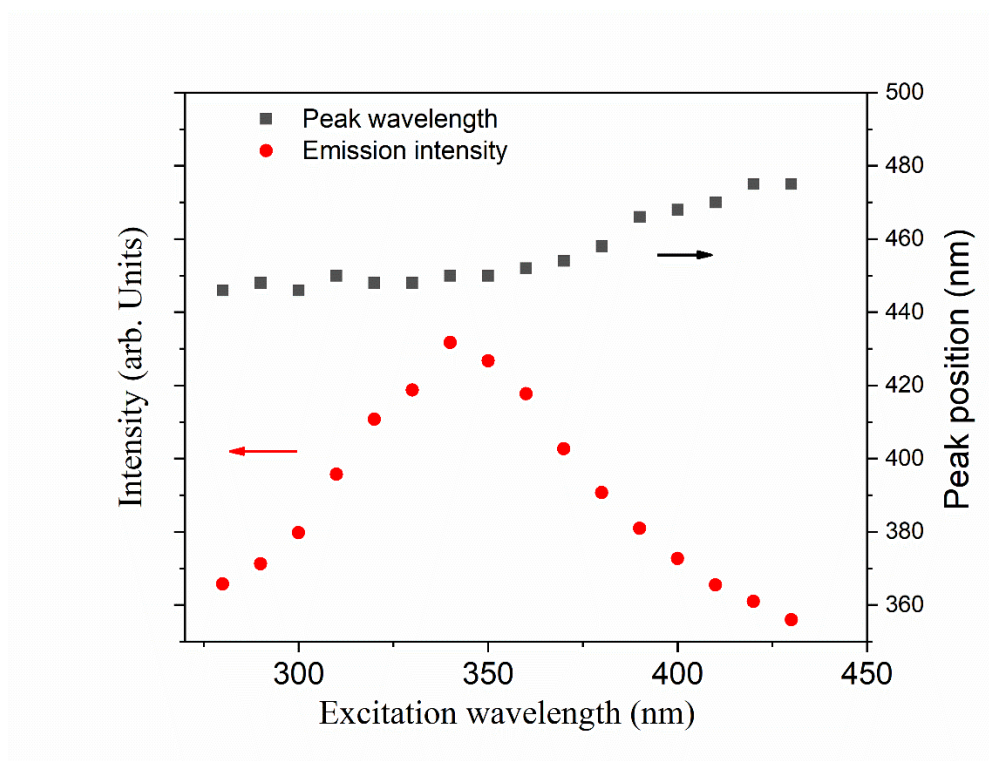

**Figure S2.** Dependence on the excitation wavelength of fluorescent emission intensity and peak wavelength in N-CDs-W-THF.

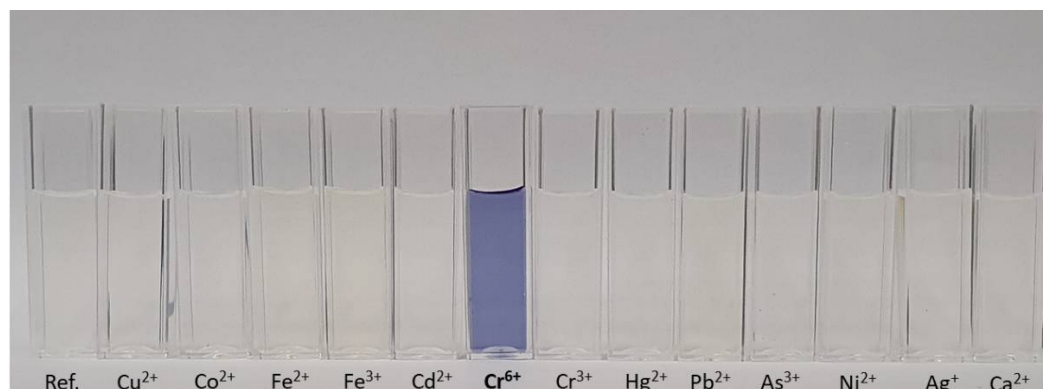

**Figure S3.** White-light image of the pristine N-CDs-W-THF sensing solution (Ref) and after the addition of different HM ions at a concentration of 100  $\mu$ M and calcium ions at 1 mM.

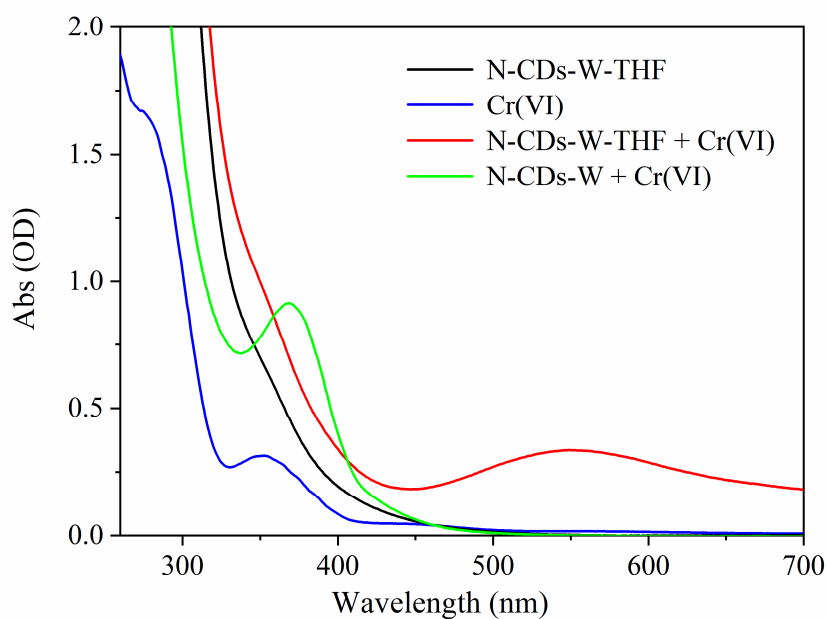

**Figure S4.** UV-vis absorption spectra of N-CDs-W-THF reference solution (black curve), Cr(VI) in DI water at 100  $\mu$ M (blue), N-CDs-W-THF solution (red) and N-CDs-W solution (green) in the presence of Cr(VI) ions at a concentration of 100  $\mu$ M.

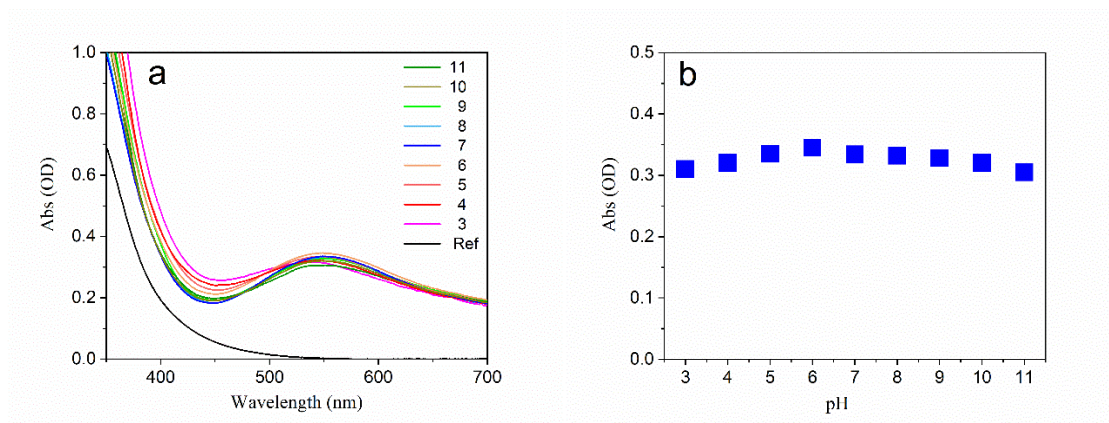

**Figure S5.** (a) UV-vis absorption spectra of N-CDs-W-THF and (b) absorbance at 550 nm of the sensing solution upon the addition of DI water with 100  $\mu$ M of Cr(VI) ions at different values of pH in the optimized volume ratio 2:1.

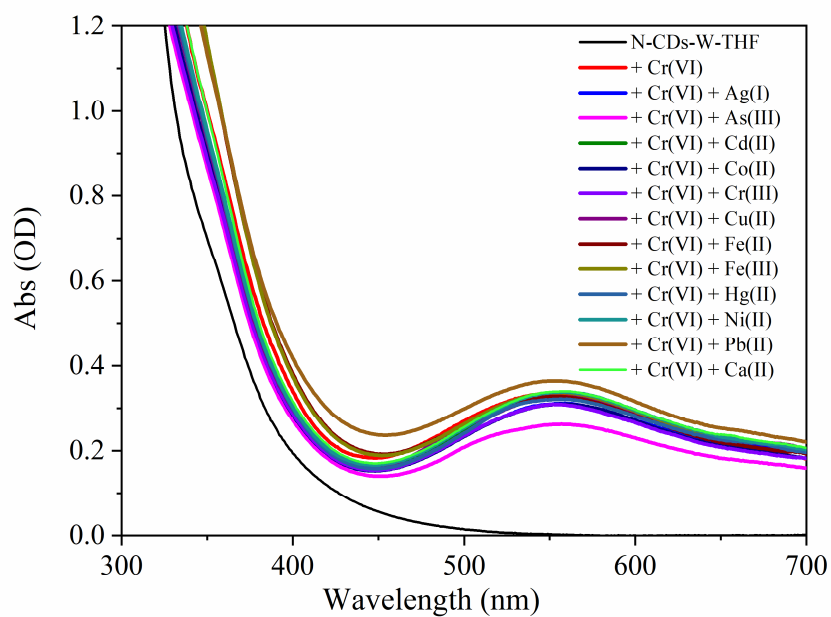

**Figure S6.** UV-vis absorption spectra of N-CDs-W-THF reference solution upon the addition of Cr(VI) and other interfering HM ions at a concentration of 100  $\mu\text{M}$  and calcium ions at 1 mM.

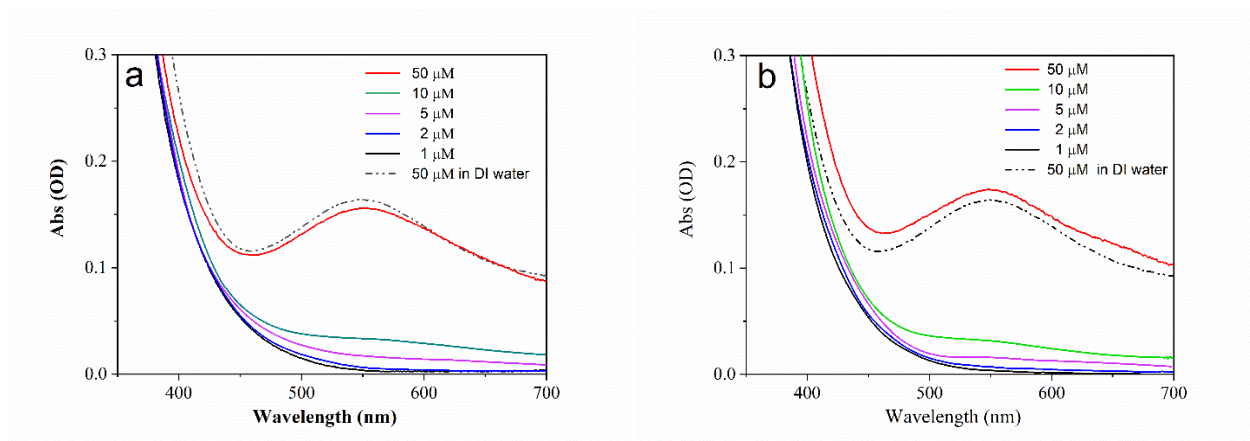

**Figure S7.** UV-vis absorption spectra of N-CDs-W-THF reference solution upon the addition of (a) tap water and (b) lake water spiked with different concentrations of Cr(VI).

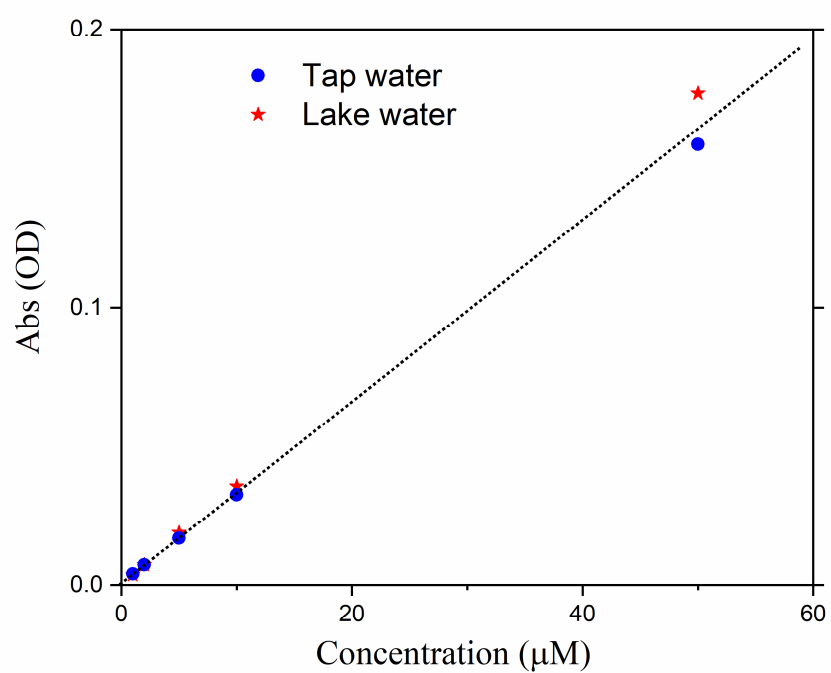

**Figure S8.** Absorbance at 550 nm as a function of Cr(VI) concentration in tap water samples (circles) and lake water samples (stars). The dotted line is the calibration curve obtained with DI water.
